# Supplementary material
Source: MDPI journal article supplement (https://www.mdpi.com/2073-4433/12/2/275)
Supplement: s1 [file s1]

## **Supplementary Material**

### **“Environmental Partitioning, Spatial Distribution, and Transport of Atmospheric Mercury (Hg) Originating from a Site of Former Chlor-alkali Plant”**

#### **S1. Detailed description of input parameters for fugacity models**

For the Level I model, the input included chemical properties of Hg (same input was used for QWASI: molecular weight, Log  $K_{ow}$ , melting point, water solubility, vapor pressure, water temperature); environmental parameters, i.e., volumes and densities of all compartments - air, aerosol, water, suspended particulate matter (SPM), fish, soil and sediments; organic carbon (OC) in soil, sediments, SPM; fish lipid content and input Hg mass (in kg). The lake depth and area were taken from [1], fish lipid content was calculated from the real fish types reported in [2]; for everything else, the values were adapted from [3], and the volumes of the segments were adjusted to be proportional to the lake water volume. Since the Level I model is the only to take into account the soil compartment, the total Hg input was taken as 1000 t (total Hg mass discharged into the environment from the plant during the whole operating period [1, 4]), whereas in other models only direct input of Hg to the lake was considered - 135,400 kg [5]. The outputs of models can be also found in Table 2 of the manuscript.

For the QWASI, the variables were similar to Level 1 in terms of chemical parameters of Hg (and degradation half-lives in water and sediments); however, environmental parameters were different since this model does not include soil and sediments, but rather focuses on the lake parameters - surface area, mean depth, volume, active sediment layer depth, density and concentration of the solids in lake and inflow water, aerosol and sediment, and OC fraction in those. For deposition, burial, and resuspension rates of the sediments, atmospheric deposition parameters, and mass transfer coefficients (MTC), HERMES default values were used as input.

Modified input variables in the HERMES model for Balkyldak simulation were: water temperature, lake size parameters (i.e., surface area, mean depth, and volume), precipitation rate, the concentration of Hg in air, water inflow rate, and its Hg concentration, as well some densities and organic carbon fractions in the compartments. Other parameters were assumed default since the data from the real site was not available.

Finally, some of the input parameters were selected based on the assumptions, but in order to obtain more reliable results, additional runs with modified parameters for all models were performed. Sensitivity analysis might be helpful in understanding which factors and/or parameters affect the fugacity the most.

- The concentration of SPM in the water: the default value of 0.463 mg/L in the HERMES was adapted from the measurement in Harp Lake in Ontario, Canada [6]. While in the generic environment described in [3], SPM concentration in the water was approximately 5 mg/L, so additional models were simulated with this value in all three programs.
- According to [5], Hg concentrations in the near-earth air on the territory of the chemical plant measured in 2006 were in the range of 100-1600 ng/m<sup>3</sup>, and the value of 300 ng/m<sup>3</sup> was exceeded in 7 out of 16 points; but during the field trips in 2018-2019, the average Hg concentration in air around lake Balkyldak was 17 ng/m<sup>3</sup>. So, QWASI and HERMES models were additionally simulated with 300 ng/m<sup>3</sup> Hg air concentration.
- Since Balkyldak is a settling lagoon formed specifically for industrial waste, there is no inflow from any river, only wastewater discharge from the PCP. The average wastewater discharge rate during the years of operation was approximately 20–25 m<sup>3</sup>/h, and Hg concentrations in the outflow water usually were in the range of 15-40 mg/L [1]. In QWASI and HERMES models, non-zero (river) inflow rate was taken as 22.5 m<sup>3</sup>/h; however, since current wastewater discharge is unknown, additional runs were performed with a very low (assumed) value of 0.001 m<sup>3</sup>/h.

**Table S1.** Semivariogram parameters and prediction error statistics

| Parameters                      | Campaign 1         | Campaign 2         | Campaign 3         | Campaign 4         |
|---------------------------------|--------------------|--------------------|--------------------|--------------------|
| <i>Semivariogram parameters</i> |                    |                    |                    |                    |
| Model parameter                 | 1.95078            | 2                  | 2                  | 0.2                |
| Nugget                          | 0                  | 0.01131            | 0.06480            | 0.13323            |
| Major range                     | 0.01828            | 0.03000            | 0.04922            | 0.01431            |
| Partial sill                    | 0.12014            | 0.00737            | 0.11708            | 0.10014            |
| Lag size                        | 0.00229            | 0.00375            | 0.00615            | 0.00179            |
| Number of lags                  | 12                 | 12                 | 12                 | 12                 |
| <i>Cross validation</i>         |                    |                    |                    |                    |
| Regression function             | $0.698 * x + 3.65$ | $0.104 * x + 6.96$ | $0.321 * x + 2.82$ | $0.196 * x + 3.08$ |
| Mean                            | -0.20055           | -0.01658           | -0.00457           | 0.08829            |
| Root-mean-square                | 3.74285            | 0.87899            | 1.57385            | 1.90173            |
| Mean standardized               | -0.00788           | -0.01308           | -0.02072           | 0.01868            |
| Root-mean-squared standardized  | 0.88109            | 0.91889            | 1.06798            | 0.66235            |
| Average standard error          | 4.32538            | 1.00121            | 1.41896            | 2.60418            |

**Table S2.** Field measurement results of ambient TGM in Pavlodar.

| No. | Campaign 1: 23.07.2019 |            |            |                        | Campaign 2: 24.07.2019 |           |            |                        | Campaign 3: 25.07.2019 |           |            |                        | Campaign 4: 26.07.2019 |           |            |                        |
|-----|------------------------|------------|------------|------------------------|------------------------|-----------|------------|------------------------|------------------------|-----------|------------|------------------------|------------------------|-----------|------------|------------------------|
|     | Latitude               | Longitude  | Local Time | TGM, ng/m <sup>3</sup> | Latitude               | Longitude | Local Time | TGM, ng/m <sup>3</sup> | Latitude               | Longitude | Local Time | TGM, ng/m <sup>3</sup> | Latitude               | Longitude | Local Time | TGM, ng/m <sup>3</sup> |
| 1   | 52.3928                | 76.96555   | 11:36      | 22                     | 52.40811               | 76.86362  | 10:12      | 9                      | 52.28409               | 76.95283  | 21:38      | 5                      | 52.30914               | 76.94105  | 11:36      | 4                      |
| 2   | 52.3938                | 76.9155833 | 11:46      | 22                     | 52.44476               | 76.86619  | 10:18      | 8                      | 52.29155               | 76.95177  | 21:41      | 5                      | 52.32988               | 76.92821  | 11:39      | 5                      |
| 3   | 52.39785               | 76.9135    | 11:55      | 16                     | 52.44735               | 76.88436  | 10:21      | 8                      | 52.29844               | 76.94952  | 21:44      | 6                      | 52.34356               | 76.92787  | 11:42      | 5                      |
| 4   | 52.4130167             | 76.9118833 | 12:18      | 15                     | 52.4494                | 76.89952  | 10:23      | 8                      | 52.30469               | 76.92876  | 21:52      | 3                      | 52.36762               | 76.92739  | 11:44      | 3                      |
| 5   | 52.4307833             | 76.9118833 | 12:37      | 15                     | 52.45277               | 76.90614  | 10:26      | 9                      | 52.32397               | 76.92836  | 21:57      | 4                      | 52.38339               | 76.92701  | 11:47      | 5                      |
| 6   | 52.4303667             | 76.9110333 | 12:53      | 15                     | 52.4498                | 76.86163  | 10:35      | 9                      | 52.34492               | 76.92784  | 22:00      | 4                      | 52.38359               | 76.94883  | 11:49      | 6                      |
| 7   | 52.4384                | 76.9118167 | 12:58      | 14                     | 52.46082               | 76.87165  | 10:37      | 8                      | 52.36765               | 76.92736  | 22:04      | 3                      | 52.39096               | 76.96494  | 11:52      | 6                      |
| 8   | 52.4409333             | 76.9169    | 13:01      | 13                     | 52.46382               | 76.88918  | 10:40      | 7                      | 52.38343               | 76.92834  | 22:07      | 6                      | 52.38322               | 76.90128  | 11:59      | 6                      |
| 9   | 52.4444667             | 76.9299833 | 13:24      | 30                     | 52.46751               | 76.95386  | 10:55      | 7                      | 52.38367               | 76.95243  | 22:11      | 8                      | 52.38299               | 76.87693  | 12:02      | 5                      |
| 10  | 52.4431667             | 76.9323    | 13:44      | 24                     | 52.47342               | 76.95298  | 11:18      | 9                      | 52.389                 | 76.96503  | 22:14      | 6                      | 52.3671                | 76.88286  | 12:07      | 2                      |
| 11  | 52.4355                | 76.9628833 | 14:20      | 22                     | 52.47609               | 76.96676  | 11:25      | 8                      | 52.39013               | 76.96493  | 22:16      | 12                     | 52.34594               | 76.89311  | 12:09      | 3                      |
| 12  | 52.4407667             | 76.9724833 | 14:29      | 26                     | 52.4768                | 76.9929   | 11:40      | 7                      | 52.38323               | 76.90302  | 22:24      | 6                      | 52.32518               | 76.90469  | 12:11      | 4                      |
| 13  | 52.4400333             | 76.9854833 | 14:34      | 27                     | 52.47844               | 76.99763  | 11:53      | 7                      | 52.38297               | 76.87589  | 22:32      | 1                      | 52.30982               | 76.92755  | 12:15      | 2                      |
| 14  | 52.4391                | 76.9981167 | 14:52      | 17.5                   | 52.46622               | 76.99795  | 12:07      | 8                      | 52.36642               | 76.88319  | 22:35      | 3                      | 52.30808               | 76.96002  | 12:18      | 2                      |
| 15  | 52.4365                | 77.0068333 | 15:23      | 32                     | 52.46369               | 76.99763  | 12:20      | 7                      | 52.34496               | 76.89363  | 22:37      | 2                      | 52.31859               | 76.96252  | 12:19      | 2                      |

|    |            |            |       |    |          |          |       |   |          |          |       |   |          |          |       |   |
|----|------------|------------|-------|----|----------|----------|-------|---|----------|----------|-------|---|----------|----------|-------|---|
| 16 | 52.4288167 | 77.0063167 | 15:34 | 37 | 52.4637  | 76.99246 | 12:32 | 9 | 52.32357 | 76.90673 | 22:40 | 2 | 52.32161 | 76.96251 | 12:21 | 3 |
| 17 | 52.42155   | 76.9973833 | 15:46 | 15 | 52.46276 | 76.97564 | 12:55 | 9 | 52.3098  | 76.92864 | 22:44 | 2 | 52.29777 | 76.96494 | 12:31 | 4 |
| 18 | 52.4166333 | 76.9982833 | 15:58 | 12 | 52.46191 | 76.96518 | 13:10 | 9 | 52.30812 | 76.9613  | 22:47 | 2 | 52.29877 | 76.97247 | 12:33 | 5 |
| 19 | 52.4107    | 77.0133    | 16:10 | 13 | 52.46498 | 76.9519  | 13:22 | 7 | 52.3209  | 76.96254 | 22:50 | 2 | 52.29801 | 76.98605 | 12:35 | 3 |
| 20 | 52.4042    | 77.0181667 | 16:17 | 11 | 52.45961 | 76.96199 | 13:33 | 7 | 52.32743 | 76.96239 | 22:52 | 3 | 52.29871 | 77.00236 | 12:37 | 2 |
| 21 | 52.40025   | 77.02465   | 16:22 | 13 | 52.46143 | 76.97348 | 13:44 | 7 | 52.30126 | 76.96271 | 23:06 | 3 | 52.30165 | 77.02464 | 12:40 | 3 |
| 22 | 52.3863333 | 77.0234833 | 16:32 | 9  | 52.43721 | 76.99004 | 14:10 | 6 | 52.29675 | 76.95117 | 23:06 | 3 | 52.29223 | 77.02632 | 12:41 | 2 |
| 23 | 52.3841833 | 77.00785   | 16:34 | 9  | 52.43743 | 76.98412 | 14:30 | 6 | 52.29404 | 76.93995 | 23:10 | 4 | 52.28936 | 77.00776 | 12:43 | 3 |
| 24 | 52.3738667 | 77.0280167 | 16:40 | 9  | 52.43786 | 76.97653 | 14:46 | 6 | 52.29008 | 76.94066 | 23:13 | 3 | 52.28765 | 76.98788 | 12:46 | 2 |
| 25 | 52.37555   | 77.04275   | 16:43 | 8  | 52.43726 | 76.94865 | 15:21 | 8 | 52.29123 | 76.96252 | 23:16 | 4 | 52.28406 | 76.96762 | 12:50 | 3 |
| 26 | 52.37425   | 77.0506833 | 16:44 | 9  | 52.43827 | 76.93742 | 15:30 | 8 | 52.29147 | 76.97183 | 23:18 | 5 | 52.28133 | 76.95644 | 12:52 | 3 |
| 27 | 52.3692667 | 77.0516667 | 16:46 | 11 | 52.4212  | 76.91217 | 16:10 | 8 | 52.29857 | 76.97353 | 23:20 | 5 | 52.28086 | 76.94207 | 12:55 | 3 |
| 28 | 52.35995   | 77.0553167 | 16:48 | 14 |          |          |       |   | 52.29812 | 76.98652 | 23:22 | 5 | 52.27536 | 76.94192 | 12:57 | 3 |
| 29 | 52.3474    | 77.0521833 | 16:51 | 13 |          |          |       |   | 52.29887 | 77.00354 | 23:24 | 5 | 52.27549 | 76.95825 | 13:00 | 4 |
| 30 | 52.3289833 | 77.0333167 | 16:53 | 7  |          |          |       |   | 52.30177 | 77.02505 | 23:26 | 5 | 52.27615 | 76.97656 | 13:04 | 4 |
| 31 | 52.3219333 | 77.0259667 | 16:54 | 5  |          |          |       |   | 52.29224 | 77.02632 | 23:27 | 5 | 52.27139 | 76.98376 | 13:06 | 2 |
| 32 | 52.31285   | 77.0204667 | 16:55 | 4  |          |          |       |   | 52.28922 | 77.00665 | 23:29 | 6 | 52.26525 | 76.98315 | 13:08 | 3 |
| 33 | 52.3023833 | 77.02495   | 16:56 | 4  |          |          |       |   | 52.28762 | 76.98553 | 23:32 | 6 | 52.26449 | 76.96522 | 13:10 | 3 |
| 34 | 52.2911667 | 77.0218    | 16:58 | 6  |          |          |       |   | 52.28722 | 76.97272 | 23:35 | 5 | 52.28653 | 76.96458 | 15:26 | 5 |

|    |            |            |       |    |  |  |  |  |          |          |       |   |          |          |       |   |
|----|------------|------------|-------|----|--|--|--|--|----------|----------|-------|---|----------|----------|-------|---|
| 35 | 52.2881833 | 76.9989167 | 17:00 | 5  |  |  |  |  | 52.2841  | 76.96877 | 23:38 | 5 | 52.28619 | 76.93777 | 15:40 | 4 |
| 36 | 52.28765   | 76.9878667 | 17:02 | 9  |  |  |  |  | 52.28128 | 76.95541 | 23:40 | 5 |          |          |       |   |
| 37 | 52.28045   | 76.9875833 | 17:04 | 10 |  |  |  |  | 52.28082 | 76.94165 | 23:43 | 5 |          |          |       |   |
| 38 | 52.2763    | 76.9769333 | 17:07 | 8  |  |  |  |  | 52.27536 | 76.94199 | 23:44 | 4 |          |          |       |   |
| 39 |            |            |       |    |  |  |  |  | 52.27557 | 76.95911 | 23:48 | 3 |          |          |       |   |
| 40 |            |            |       |    |  |  |  |  | 52.2765  | 76.98156 | 23:51 | 3 |          |          |       |   |
| 41 |            |            |       |    |  |  |  |  | 52.2704  | 76.98392 | 23:52 | 3 |          |          |       |   |
| 42 |            |            |       |    |  |  |  |  | 52.26527 | 76.98246 | 23:54 | 3 |          |          |       |   |
| 43 |            |            |       |    |  |  |  |  | 52.26447 | 76.96342 | 23:57 | 2 |          |          |       |   |

**Table S3.** Model compartment dimensions for Level I fugacity modeling

| Medium              | Volume (m <sup>3</sup> ) | Notes                                         |
|---------------------|--------------------------|-----------------------------------------------|
| Air                 | 1.00E+11                 | 100 km <sup>2</sup> x 1 km [3]                |
| Aerosol             | 2.00E+00                 | $V_{\text{air}} \times 2 \times 10^{-11}$ [3] |
| Water               | 6.75E+07                 | Lake area x mean depth [1]                    |
| Suspended particles | 3.38E+02                 | 0.463 ppm [6]                                 |
| Fish                | 6.75E+01                 | 1 ppm in water [3]                            |
| Soil                | 6.43E+05                 | Water/soil area = 70:30 [7]                   |
| Sediments           | 1.50E+05                 | 1 cm [3] x lake area                          |

**Table S4.** Input parameters for QWASI model

|                                                                       |              |
|-----------------------------------------------------------------------|--------------|
| Lake surface area (m <sup>2</sup> )                                   | 1.50E+07 [1] |
| Water volume (m <sup>3</sup> )                                        | 6.75E+07 [1] |
| Sediment active layer depth (m)                                       | 1.00E-02 [3] |
| Concentration of solids in water (mg/L)                               | 4.63E-01 [6] |
| Concentration of solids in inflow (mg/L)                              | 4.63E-01 [6] |
| Concentration of solids in aerosol (µg/m <sup>3</sup> )               | 4.00E+01 [6] |
| Concentration of solids in sediment (m <sup>3</sup> /m <sup>3</sup> ) | 9.00E-02 [6] |
| Q Suspended particles (kg/m <sup>3</sup> )                            | 1.50E+03 [3] |
| Q Sediments (kg/m <sup>3</sup> )                                      | 2.40E+03 [3] |
| Q Aerosol (kg/m <sup>3</sup> )                                        | 2.00E+03 [3] |



**Table S5.** Input parameters for HERMES model

|                                               |          |
|-----------------------------------------------|----------|
| Water surface area (m2)                       | 1.50E+07 |
| Water volume (m3)                             | 6.75E+07 |
| Mean water depth (m)                          | 4.50E+00 |
| Sediment active layer depth (m)               | 1.00E-02 |
| Precipitation rate (m/yr)                     | 2.50E-01 |
| Settling rate of solids (g/m2 day)            | 3.04E-01 |
| Resuspension rate of solids (g/m2 day)        | 2.43E-01 |
| Burial rate of solids (g/m2 day) *            | 6.08E-02 |
| Total suspended solids in water (mg/L)        | 4.63E-01 |
| Total suspended solids in inflow water (mg/L) | 4.63E-01 |
| Concentration of particles in air (ug/m3)     | 4.00E+01 |
| Aerosol dry deposition velocity (m/h)         | 1.08E+01 |
| Volume fraction particles in surface sediment | 9.00E-02 |
| Density of water particles (kg/m3)            | 1.50E+03 |
| Density of sediment particles (kg/m3)         | 2.40E+03 |
| Density of air particles (kg/m3)              | 2.00E+03 |
| Fraction OC in water column particles         | 2.00E-01 |
| Fraction OC in sediment solids (SS)           | 4.00E-02 |
| Fraction OC in resuspended SS                 | 2.00E-01 |
| Fraction OC in inflow suspended SS            | 4.00E-02 |

**Figure S1.** Atmospheric Hg dispersion over region around Lake Balkyldak during Campaign 2

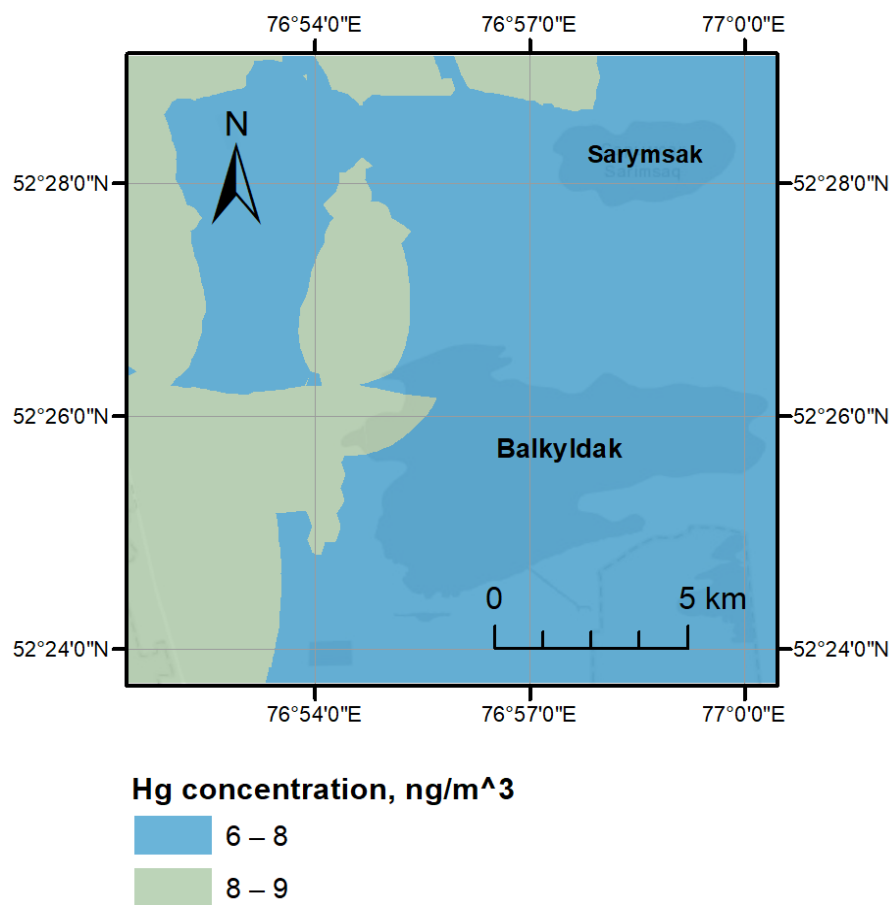

## References

- [1] Ullrich, S.M.; Ilyushchenko M.A.; Kamberov, I.M.; Tanton, T.W. Mercury contamination in the vicinity of a derelict chlor-alkali plant. Part I: Sediment and water contamination of Lake Balkyldak and the River Irtysh. *Science of the Total Environment*, **2007a** 381(1-3): p. 1-16. doi: 10.1016/j.scitotenv.2007.02.033
- [2] Ilyushchenko, M.A.; Uskov, G.A.; Zyryanova, N.A. Mercury (Hg) contamination of fish fauna of Bylkyldak technical pond. *KazNU Scientific Journal* **2002**, Environmental Series, 11, 102-105. (In Russian)
- [3] Mackay, D.; Paterson, S.; Shiu, W. Generic models for evaluating the regional fate of chemicals. *Chemosphere* **1992**, 24(6): p. 695-717. doi: 10.1016/0045-6535(92)90531-u
- [4] Randall, P.; Ilyushchenko, M.A.; Lapshin, E.; Kuzmenko, L. Case study: mercury pollution near a chemical plant in Northern Kazakhstan. *Air and Waste Management Association* **2005**, 2, 19-24.
- [5] Ilyushchenko, M.A.; Panichkin, V.; Randall, P.M.; Kamberov, R. Former Chlor-alkali Factory in Pavlodar, Kazakhstan: Mercury Pollution, Treatment Options, and Results of Post-demercurization Monitoring. *Bioremediation of Mercury: Current Research and Industrial Applications* **2013**, I. Wagner-Döbler, Editor. Caister Academic Press: U.K.
- [6] Ethier, A.; Lean, D.; Scheuhammer, A.; Bodek, T.; Sosso-Kolle, K. Predicting mercury concentrations and fluxes in the water column and sediment of lakes with a limited dataset. *Environmental Toxicology and Chemistry* **2010**, 29(7), pp.1457-1465. doi: 10.1016/j.envpol.2011.06.002
- [7] Mackay, D.; Paterson, S. Calculating fugacity. *Environmental Science & Technology* **1981**, 15, 9: p. 1006-14. doi: 10.1021/es00091a001
